# Supplementary material
Source: HighWire-hosted journal article supplement (http://www.annfammed.org/highwire/filestream/8889/field_highwire_adjunct_files/0/Carey_Supp_App.pdf)
Supplement: Carey_Supp_App.pdf [file Carey_Supp_App.pdf]

**Supplemental materials for:**

Hosking F, Carey IM, DeWilde S, Harris T, Beighton C, Cook D, Shah S. Preventable emergency hospital admissions among adults with intellectual disability in England. *Ann Fam Med*. 2017;15(5):462-470.

## Appendix:

**E-Table 1: ICD-10 codes used in definition of Ambulatory Case Sensitive conditions (ACSCs)**

| Condition                        | ICD-10 codes                                                                                           |
|----------------------------------|--------------------------------------------------------------------------------------------------------|
| Angina                           | I20, I24.0, I24.8, I24.9                                                                               |
| Aspiration                       | J69.0 J69.8                                                                                            |
| Asthma                           | J45, J46                                                                                               |
| Cellulitis                       | L03, L04, L08, L88, L98.0 L98.3                                                                        |
| COPD                             | J41-J44, J47                                                                                           |
| Congestive heart failure         | I11.0 I50, J81                                                                                         |
| Constipation                     | K59.0                                                                                                  |
| Convulsions/epilepsy             | G40, G41, O15, R56                                                                                     |
| Dehydration & gastroenteritis    | E86, K52.2, K52.8, K52.9                                                                               |
| Dental conditions                | A69.0, K02-K06, K08, K09.8, K09.9, K12, K13                                                            |
| Diabetes complications           | E10.0-E10.8, E11.0-E11.8, E12.0-E12.8, E13.0-13.8, E14.0-E14.8                                         |
| Ear, nose and throat             | H66, H67, J02, J03, J06, J31.2                                                                         |
| Gangrene                         | R02                                                                                                    |
| GERD                             | K21                                                                                                    |
| Hypertension                     | I10, I11.9                                                                                             |
| Influenza                        | J10, J11                                                                                               |
| Iron deficiency anaemia          | D50.1, D50.8, D50.9                                                                                    |
| Nutritional deficiencies         | E40-E43, E55, E64.3                                                                                    |
| Pelvic inflammatory disease      | N70, N73, N74                                                                                          |
| Perforated/bleeding ulcer        | K25.0-K25.2, K25.4-K25.6, K26.0-K26.2, K26.4-K26.6, K27.0-K27.2, K27.4-K27.6, K28.0-K28.2, K28.4-K28.6 |
| Pneumonia and other LRTI         | J13, J14, J15, J16, J17.8, J18, J20-J20.2, J20.8, J20.9, J22                                           |
| TB and other vaccine preventable | A15, A16, A19, A35-37, A80, B05, B06, B16.1, B16.9, B18.0, B18.1, B26, G00.0, M01.4                    |
| UTI                              | N10, N11, N12, N13.6, N39.0                                                                            |
